# Supplementary material
Source: PubMed Central journal article supplement (PMC2763056)
Supplement: NIHMS142849-supplement-1_si_001.pdf [file NIHMS142849-supplement-1_si_001.pdf]

## Supporting Information

### **Nosiheptide Biosynthesis Featuring a Unique Indole Side Ring Formation on a Characteristic Thiopeptide Framework**

Yi Yu<sup>1,2</sup>, Lian Duan<sup>1</sup>, Qi Zhang<sup>1</sup>, Rijing Liao<sup>1</sup>, Ying Ding<sup>1</sup>, Haixue Pan<sup>1</sup>, Evelyn Wendt-Pienkowski<sup>3</sup>, Gongli Tang<sup>1</sup>, Ben Shen<sup>3</sup>, and Wen Liu<sup>1,2\*</sup>

<sup>1</sup> State Key Laboratory of Bioorganic and Natural Products Chemistry, Shanghai Institute of Organic Chemistry, Chinese Academy of Sciences, 345 Lingling Rd., Shanghai, 200032, China

<sup>2</sup> Laboratory of Microbial Metabolism and School of Life Science & Biotechnology, Shanghai Jiaotong University, 1954 Huashan Rd., Shanghai, 200030, China

<sup>3</sup> Division of Pharmaceutical Sciences, School of Pharmacy, University of Wisconsin-Madison, Madison, WI 53705, USA

\* To whom correspondence should be addressed: Shanghai Institute of Organic Chemistry, Chinese Academy of Sciences, 345 Lingling Rd., Shanghai, 200032, China. Wen Liu, Email: [wliu@mail.sioc.ac.cn](mailto:wliu@mail.sioc.ac.cn), Tel: 86-21-54925111, Fax: 86-21-64166128

**Table S1. Bacterial strains and plasmids used in this study**

| Strain/Plasmid/Primer         | Characteristic(s)                                                                                  | Reference  |
|-------------------------------|----------------------------------------------------------------------------------------------------|------------|
| <i>E. coli</i>                |                                                                                                    |            |
| DH5 $\alpha$                  | Host for general cloning                                                                           | Invitrogen |
| LE392                         | Host for constructing the genomic library                                                          | Promega    |
| ET12567                       | Donor strain for conjugation between <i>E.coli</i> and <i>Streptomyces</i>                         | (1)        |
| <i>Streptomyces</i>           |                                                                                                    |            |
| <i>S. actuosus</i> ATCC 25421 | Wild type strain, nosiheptide producing                                                            | ATCC       |
| SL4001                        | $\Delta nosG$ mutant, nosiheptide non-producing                                                    | This study |
| SL4002                        | $\Delta nosM$ mutant, nosiheptide non-producing                                                    | This study |
| SL4003                        | SL4002 derivative that contains pSL4020 for expressing <i>nosM</i> in trans, nosiheptide producing | This study |
| SL4004                        | $\Delta nosH$ mutant, nosiheptide non-producing                                                    | This study |
| SL4005                        | $\Delta nosL$ mutant, nosiheptide non-producing                                                    | This study |
| SL4006                        | $\Delta nosN$ mutant, nosiheptide non-producing                                                    | This study |
| SL4007                        | $\Delta nosP$ mutant, nosiheptide non-producing                                                    | This study |
| <b>Plasmids</b>               |                                                                                                    |            |
| pMD19-T                       | <i>E. coli</i> subcloning vector                                                                   | TaKaRa     |
| pOJ446                        | <i>E.coli-Streptomyces</i> shuttle vector for construction of the genomic library                  | NRRL 14791 |

---

|         |                                                                                                                                                |
|---------|------------------------------------------------------------------------------------------------------------------------------------------------|
| pOJ260  | <i>E.coli-Streptomyces</i> shuttle vector for gene NRRL14785<br><br>inactivation, nonreplicating in <i>Streptomyces</i>                        |
| pKC1139 | <i>E.coli-Streptomyces</i> shuttle vector for gene (2)<br><br>inactivation, temperature sensitive replication in<br><br><i>Streptomyces</i>    |
| pSET152 | <i>E.coli-Streptomyces</i> shuttle vector for heterologous (2)<br><br>complementation, site-specific integration in<br><br><i>Streptomyces</i> |
| pSL4001 | pOJ446-based <i>S. actuosus</i> genomic library This study<br><br>cosmid                                                                       |
| pSL4002 | pMD19-T derivative containing a 0.7 kb PCR This study<br><br>product from <i>S. actuosus</i> genomic DNA                                       |
| pSL4003 | pOJ260 derivative containing a 0.7 kb fragment, This study<br><br>construct for <i>nosG</i> inactivation                                       |
| pSL4004 | pMD19-T derivative containing a 2.2 kb PCR This study<br><br>product from pSL4001                                                              |
| pSL4005 | pMD19-T derivative containing a 2.1 kb PCR This study<br><br>product from pSL4001                                                              |
| pSL4006 | pKC1139 derivative containing a 4.3 kb fragment, This study<br><br>construct for <i>nosM</i> in-frame inactivation                             |
| pSL4007 | pMD19-T derivative containing a 1.8 kb PCR This study<br><br>product from pSL4001                                                              |

---

---

|         |                                                                                                  |            |
|---------|--------------------------------------------------------------------------------------------------|------------|
| pSL4008 | pMD19-T derivative containing a 2.0 kb PCR product from pSL4001                                  | This study |
| pSL4009 | pKC1139 derivative containing a 3.8 kb fragment, construct for <i>nosH</i> in-frame inactivation | This study |
| pSL4010 | pMD19-T derivative containing a 2.0 kb PCR product from pSL4001                                  | This study |
| pSL4011 | pMD19-T derivative containing a 1.9 kb PCR product from pSL4001                                  | This study |
| pSL4012 | pKC1139 derivative containing a 3.9 kb fragment, construct for <i>nosL</i> in-frame inactivation | This study |
| pSL4013 | pMD19-T derivative containing a 1.9 kb PCR product from pSL4001                                  | This study |
| pSL4014 | pMD19-T derivative containing a 1.8 kb PCR product from pSL4001                                  | This study |
| pSL4015 | pKC1139 derivative containing a 3.7 kb fragment, construct for <i>nosN</i> in-frame inactivation | This study |
| pSL4016 | pMD19-T derivative containing a 1.9 kb PCR product from pSL4001                                  | This study |
| pSL4017 | pMD19-T derivative containing a 2.0 kb PCR product from pSL4001                                  | This study |
| pSL4018 | pKC1139 derivative containing a 3.9 kb fragment, construct for <i>nosP</i> in-frame inactivation | This study |

---

---

|         |                                                                                                       |            |
|---------|-------------------------------------------------------------------------------------------------------|------------|
| pSL4019 | pMD19-T derivative containing a 0.5 kb PCR product from pSL4001                                       | This study |
| pSL4020 | pSET152 derivative containing a 0.9 kb fragment, construct for $\Delta nosM$ complementation in trans | This study |

---

**Table S2. Primers used in this study for in-frame deletion of *nosM*, *nosH*, *nosL*, *nosN* and *nosP* in *S. actuosus*.**

| Gene        | Primers used in this study (5'-3')*                  |
|-------------|------------------------------------------------------|
| <i>nosM</i> | M-inf-Ls: CGACA <u>AAGCTT</u> CAGGGAGCCGTTGAGGACG    |
|             | M-inf-La: GTGT <u>TCTAG</u> ACCACCGGAAACCCCTTCCATGTC |
|             | M-inf-Rs: TCCT <u>TCTAG</u> AGGAGACGGCGCCCTGTACCG    |
|             | M-inf-Ra: TCGAGA <u>ATTCGGTGGAA</u> CGCGCTTTCGG      |
| <i>nosH</i> | H-inf-Ls: CA <u>AAGCTT</u> CCTCAACGGCTCCCTGAAGTCC    |
|             | H-inf-La: GT <u>TCTAG</u> AGCGGGTGAGGGTGTCGGTCAG     |
|             | H-inf-Rs: <u>TCTAGA</u> ACCGACCTGCTGCCCTTCCTCAC      |
|             | H-inf-Ra: CGA <u>ATTC</u> CGAAGGTCATCGGGATCAGGC      |
| <i>nosL</i> | L-inf-Ls: CA <u>AAGCTT</u> ACGCCCCGCAGGAAGAACC       |
|             | L-inf-La: <u>TCTAGA</u> ATTGCCTGGGAGTTCTGCG          |

|             |                                                       |
|-------------|-------------------------------------------------------|
|             | L-inf-Rs: <u>TCTAGA</u> CGTTCGACCACTTCGTGAACC         |
|             | L-inf-Ra: <u>GAATTC</u> GGTTCGAGGGCGATGG              |
| <i>nosN</i> | N-inf-Ls: <u>CAAGCTT</u> CCGTGCACCAGGTAGACGG          |
|             | N-inf-La: GAT <u>TCTAGAG</u> AAAGGGATGTGCACATAGATCATC |
|             | N-inf-Rs: TGT <u>TCTAGAG</u> ATGGCCATGTCCCAGC         |
|             | N-inf-Ra: <u>CGAATTC</u> GCAGATGCAGGATGTACCCC         |
| <i>nosP</i> | P-inf-Ls: GGACA <u>AAGCTT</u> TTTCAAGTCCCACCAGAAGGGCC |
|             | P-inf-La: GCGAGA <u>AATTC</u> AAGCGGTCCCAGGACATCG     |
|             | P-inf-Rs: CGAC <u>GAATTC</u> AACGTCACCTGGGACGTC       |
|             | P-inf-Ra: GGT <u>TCTAGAT</u> TACCCTGAAGACCACGCTGG     |
|             |                                                       |

\* Restriction sites for HindIII (AAGCTT), XbaI (TCTAGA) and EcoRI (GAATTC) are double-underlined

### **Inactivation of *nosG*, *nosM*, *nosH*, *nosL*, *nosN* and *nosP* in *S. actuosus***

To inactivate *nosG*, the 0.7 kb ThioF-ThioR PCR product P1 (0.7 kb internal fragment of *nosG*, ref. 3) was initially cloned into pMD19-T, yielding pSL4002. The 0.7 kb HindIII-XbaI fragment was recovered from pSL4002 and then cloned into the same sites of pOJ260, giving the recombinant plasmid pSL4003.

To inactivate *nosM*, a 2.2 kb fragment amplified by PCR using the primers M-inf-Ls/M-inf-La and a 2.1 kb fragment amplified by using the primers M-inf-Rs/M-inf-Ra were initially cloned into pMD19-T, giving pSL4004 and pSL4005, respectively. After sequencing to confirm the fidelity,

the 2.2 kb HindIII/XbaI and 2.1 kb XbaI/EcoRI fragments were recovered and co-ligated into the HindIII/EcoRI site of pKC1139, yielding the recombinant plasmid pSL4006, in which a 144 bp in-frame coding region (corresponding to AA<sub>3</sub>-AA<sub>50</sub> of the deduced product NosM) of *nosM* was deleted.

To inactivate *nosH*, a 1.8 kb fragment amplified by PCR using the primers H-inf-Ls/H-inf-La and a 2.0 kb fragment amplified by using the primers H-inf-Rs/H-inf-Ra were initially cloned into pMD19-T, giving pSL4007 and pSL4008, respectively. After sequencing to confirm the fidelity, the 1.8 kb HindIII/XbaI and 2.0 kb XbaI/EcoRI fragments were recovered and co-ligated into the HindIII/EcoRI site of pKC1139, yielding the recombinant plasmid pSL4009, in which a 1761 bp in-frame coding region (corresponding to AA<sub>26</sub>-AA<sub>612</sub> of the deduced product NosH) of *nosH* was deleted.

To inactivate *nosL*, a 2.0 kb fragment amplified by PCR using the primers L-inf-Ls/L-inf-La and a 1.9 kb fragment amplified by using the primers L-inf-Rs/L-inf-Ra were initially cloned into pMD19-T, giving pSL4010 and pSL4011, respectively. After sequencing to confirm the fidelity, the 2.0 kb HindIII/XbaI and 1.9 kb XbaI/EcoRI fragments were recovered and co-ligated into the HindIII/EcoRI site of pKC1139, yielding the recombinant plasmid pSL4012, in which a 1131 bp in-frame coding region (corresponding to AA<sub>8</sub>-AA<sub>385</sub> of the deduced product NosL) of *nosL* was deleted.

To inactivate *nosN*, a 1.9 kb fragment amplified by PCR using the primers N-inf-Ls/N-inf-La and a 1.8 kb fragment amplified by using the primers N-inf-Rs/N-inf-Ra were initially cloned into pMD19-T, giving pSL4013 and pSL4014, respectively. After sequencing to confirm the fidelity, the 1.9 kb HindIII/XbaI and 1.8 kb XbaI/EcoRI fragments were recovered and co-ligated into the

HindIII/EcoRI site of pKC1139, yielding the recombinant plasmid pSL4015, in which a 1113 bp in-frame coding region (corresponding to AA<sub>15</sub>-AA<sub>385</sub> of the deduced product NosN) of *nosN* was deleted.

To inactivate *nosP*, a 1.9 kb fragment amplified by PCR using the primers P-inf-Ls/P-inf-La and a 2.0 kb fragment amplified by using the primers P-inf-Rs/P-inf-Ra were initially cloned into pMD19-T, giving pSL4016 and pSL4017, respectively. After sequencing to confirm the fidelity, the 1.9 kb HindIII/EcoRI and 2.0 kb EcoRI/XbaI fragments were recovered and co-ligated into the HindIII/XbaI site of pKC1139, yielding the recombinant plasmid pSL4018, in which a 912 bp in-frame coding region (corresponding to AA<sub>10</sub>-AA<sub>314</sub> of the deduced product NosP) of *nosP* was deleted.

Introduction of pSL4003, pSL4006, pSL4009, pSL4012, pSL4015 or pSL4018 into *S. actuosus* was carried out by *E. coli-Streptomyces* conjugation, following the procedure described previously (4). For inactivation of *nosG*, the colonies that were apramycin-resistant were identified as the recombinant strain SL4001, whose genotype was further confirmed by Southern hybridization. For inactivation of *nosM*, *nosH*, *nosL*, *nosN* and *nosP*, the colonies that were apramycin-resistant at 37°C were identified as the integrating mutants, in which a single-crossover homologous recombination event took place. These mutants were further cultured in liquid TSB medium for three rounds without the presence of apramycin. The genotypes of resulting strains that were apramycin-sensitive were confirmed by PCR amplification and sequencing, leading to the identification of the recombinant strain SL4002, SL4004, SL4005, SL4006 and SL4007, respectively.



### **In trans complementation of *nosM* for the nosiheptide production in *S. actuosus***

To make the *nosM* expression construct, a 0.5 kb PCR product containing *nosM* was amplified by PCR using the primers 5'-TCCAAAGCTTATGGTTAGCAGCGCTTTAGC-3' (HindIII site double-underlined) and 5'-TGGTCTAGACCCAGTCGCAGAACGTGCAC-3' (XbaI site double-underlined) and cloned into pMD19-T, yielding pSL4019. The 0.5 kb HindIII/XbaI fragment was recovered from pSL4019 and co-ligated with a 0.4 kb EcoRI/HindIII fragment harboring the promoter *PermE*\* into the EcoRI/XbaI site of pSET152, yielding pSL4020, in which the 0.5 kb fragment containing *nosM* is under the control of the *PermE*\* promoter.

Introduction of pSL4020 into SL4002 was carried out by *E. coli-Streptomyces* conjugation, following the procedure described previously (4). Colonies that were apramycin resistant were identified as the recombinant strain SL4003.

**Figure S1. HPLC analysis of nosiheptide (solid circle) production in the wild type strain (I) and the *nosG* mutant SL4001 (II).**

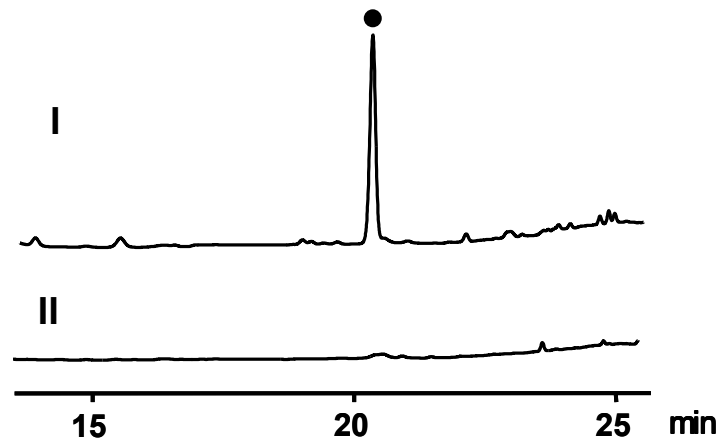

## References

1. MacNeil, D. J., Gewain, K. M., Ruby, C. L., Dezeny, G., Gibbons, P. H., and MacNeil, T. (1992) Analysis of *Streptomyces avermitilis* genes required for avermectin biosynthesis utilizing a novel integration vector, *Gene* *111*, 61-68.
2. Bierman, M., Logan, R., O'Brien, K., Seno, E. T., Rao, R. N., and Schonher, B. E. (1992) Plasmid cloning vectors for the conjugal transfer of DNA from *Escherichia coli* to *Streptomyces* spp. *Gene* *116*, 43-49.
3. Liao, R., Duan, L., Lei, C., Pan, H., Ding, Y., Zhang, Q., Chen, D., Shen, B., Yu, Y., and Liu, W. (2009) Thiopeptide biosynthesis featuring ribosomally synthesized precursor peptides and conserved posttranslational modifications, *Chem. Biol.* *16*, 141-147.
4. Kieser, T., Bibb, M., Butter, M., Chater, K. F., and Hopwood, D. A. (2000) *Practical Streptomyces Genetics*, The John Innes Foundation, Norwich.
